# Supplementary material
Source: PubMed Central journal article supplement (PMC7085805)
Supplement: DC191583SupplementaryData.pdf [file DC191583SupplementaryData.pdf]

## SUPPLEMENTARY DATA

### **Appendix 1.**

A listing of the T1D Exchange Clinic Network sites with participating principal investigators (PI), co-investigators (I) and coordinators (C) ordered by the number of participants recruited per site as of June 1, 2017 is included below:

**Syracuse, NY SUNY Upstate Medical University** (n=1762) Ruth Weinstock (PI); Roberto Izquierdo (I); Umair Sheikh (I); Patricia Conboy (C); Jane Bulger (C); Suzan Bzdick (C) **Aurora, CO Barbara Davis Center for Childhood Diabetes** (n=1761) Georgeanna Klingensmith (PI); Carolyn Banion (I); Jennifer Barker (I); Cindy Cain (I); Kristen Nadeau (I); Marian Rewers (I); Arleta Rewers (I); Robert Slover (I); Andrea Steck (I); Paul Wadwa (I); Philip Zeitler (I); Guy Alonso (I); Greg Forlenza (I); Andrea Gerard-Gonzalez (I); Melanie Green (I); Susan Gross (I); Shideh Majidi (I); Laurel Messer (C); Tyler Reznick-Lipina (C); Emily Simmons (C); Katie Thivener (C); Isabel Weber (C) **Philadelphia, PA Children's Hospital of Philadelphia** (n=1666) Steven Willi (PI); Terri Lipman (I); Olena Kucheruk (C); Pantea Minnock (C); Cathy Carchidi (C); Brian Grant (C); Diana Olivos (C) **Indianapolis, IN Riley Hospital for Children, Indiana University School of Medicine** (n=1343) Linda DiMeglio (PI); Tamara Hannon (I); Carmella Evans-Molina (I); David Hansen (I); Tina Pottorff (I); Stephanie Woerner (C); Megan Hildinger (C); Robin Hufferd (C); America Newnum (C); Devyn Purtlebaugh (C); Lisa Smith (C); Kathleen Wendholt (C) **New York City, NY Naomi Berrie Diabetes Center, Columbia University P&S** (n=1272) Robin Goland (PI); Rachelle Gandica (I); Kristen Williams (I); Sarah Pollack (C); Emily Casciano (C); Julia Hochberg (C); Cecilia Uche (C) **Ann Arbor, MI University of Michigan** (n=990) Joyce Lee (PI); Brigid Gregg (I); Meng Tan (I); Lynn Ang (I); Rodica Pop-Busui (I); Inas Thomas (I); Emily Dhadphale (C); Janet Dominowski (C); Ashley Garrity (C); Virginia Leone (C); Cynthia Plunkett (C); Brittany Plunkett (C); **Los Angeles, CA Children's Hospital Los Angeles** (n=958) Roshanak Monzavi (PI); Clement Cheung (I); Lynda Fisher (I); Mimi Kim (I); Brian Miyazaki (I); Pisit Pitukcheewanont (I); Anna Sandstrom (I); Juliana Austin (I); Nancy Change (I); Jennifer Raymond (I); Brian Ichihara (C); Megan Lipton (C); Jaquelin Flores Garcia (C); **Aurora, CO University of Colorado/Denver, Barbara Davis Center for Childhood Diabetes** (n=912) Satish Garg (PI); Aaron Michels (I); Rachel Garcetti (I); Melanie Green (I); Raymond Gutin (I); Kristen Nadeau (I); Sarit Polsky (I); Viral Shah (I); Mary Voelmle (I); Lisa Myers (C); Gregory Coe (C); Jamie Demmitt (C); Yesenia Garcia Reyes (C); Dominique Giordano (C); Prakriti Joshee (C); Emily Nease (C); Nhung Nguyen (C) **Boston, MA Children's Hospital Boston** (n=873) Joseph Wolfsdorf (PI); Maryanne Quinn (I); Constance Fontanet (C); Susmita Mukherjee (C) **Buffalo, NY University Pediatric Associates** (n=868) Kathleen Bethin (PI); Teresa Quattrin (I); Indrajit Majumdar (I); Lucy Mastrandrea (I); Emily Gorman (C); Amanda House (C); Sharon Michalovic (C); Wanda Musial (C); Barbara Shine (C) **Portland, OR Harold Schnitzer Diabetes Health Center at Oregon Health and Science University** (n=860) Andrew Ahmann (PI); Jessica Castle (I); Farahnaz Joarder (I); Diana Aby-Daniel (I); Ines Guttmann-Bauman (I); Bethany Klopfenstein (I); Victoria Morimoto (I); Nancy Cady (C); Rebecca Fitch (C); Donald DeFrang (C); Kristin Jahnke (C); Claire Patoine (C) **Salt Lake City, UT University of Utah - Utah Diabetes Center** (n=760) Vandana Raman (PI); Carol Foster (I); Mary Murray (I); Trina Brown (I); Cassandra Davis (C); Hillarie Slater (C); Jennifer Langvardt (C) **Atlanta, GA Atlanta Diabetes Associates** (n=743) Bruce Bode (PI); Jennifer Boyd (I); Joseph Johnson (I); Christopher Newton (I); Jonathan Ownby (I); RaShonda Hosey (C); Nitin Rastogi (C); Blake Winslett (C) **Seattle, WA University of Washington, Diabetes Care Center** (n=694) Irl Hirsch (PI); Anthony DeSantis (I); R Alan Failor (I); Carla Greenbaum (I); Dace Trence (I); Subbulaxmi Trikudanathan (I); Dori Khakpour (C); Pam Thomson (C); Lori Sameshima (C); Corinna Tordillos (C) **Kansas City, MO Children's Mercy Hospital** (n=607) Mark Clements (PI); Angela Turpin (I); Ghufran Babar (I); Julia Broussard (I); Joe Cernich (I); Kavitha Dileepan (I); Max Feldt (I); Wayne Moore (I); Tiffany Musick (I); Susana Patton (I); Yun Yan (I); Sarah Tsai (I); Jennifer Bedard (C); Aliza Elrod (C); Lois Hester (C); Marissa Beidelschies (C); Julie de la Garza (C); Emily Haith (C);

## SUPPLEMENTARY DATA

Jennifer James (C); Elizabeth Ramey (C); Jessica Slover (C); Armenthia Valentine (C); Darta Watkins (C); Misty Whisenhunt (C); Jami Wierson (C)

**Stanford, CA Stanford University School of Medicine, Division of Pediatric Endocrinology** (n=602) Darrell Wilson (PI); Bruce Buckingham (I); David Maahs (I); Priya Prahald (I); Liana Hsu (C); Ryan Kingman (C); Ideen Tabatabai (C) **Idaho Falls, ID Rocky Mountain Diabetes & Osteoporosis Center, PA** (n=567) David Liljenquist (PI); Mark Sulik (PI); Carl Vance (PI); Jean Halford (C); Christine Funke (C) **Grand Rapids, MI Helen DeVos Children's Hospital Endocrinology and Diabetes** (n=565) Yaw Appiagyei-Dankah (PI); Emily Beltz (C); Karen Moran (C); **Morristown, NJ BD Diabetes Center at Goryeb Children's Hospital** (n=561) Harold Starkman (PI); Barbara Cerame (I); Daisy Chin (I); Laurie Ebner-Lyon (I); Kristen Sabanosh (I); Lawrence Silverman (I); Christine Wagner (I); Sunita Cheruvu (I); Marie Fox (C); Frances Melchionne (C); **Minneapolis, MN International Diabetes Center/Park Nicollet Adult Endocrinology** (n=552) Richard Bergenstal (PI); Marcia Madden (I); Thomas Martens (I); Amy Criego (I); Margaret Powers (I); Anders Carlson (I); Shannon Beasley (C); Beth Olson (C); LeeAnn Thomas (C); Kathleen McCann (C); Sean Dunnigan (C); Charlotte Ashanti (C); **Nashville, TN Vanderbilt Eskind Diabetes Clinic** (n=535) Jill Simmons (PI); William Russell (I); Sarah Jaser (I); Jennifer Kelley (I); Faith Brendle (C); Lauren Williams (C); Kimberly Savin (C); Kimberly Flowers (C); George Williams (C); Emily Hamburger (C); Angelia Davis (C); Brenna Hammel (C); **New Haven, CT Yale Pediatric Diabetes Program** (n=534) Eda Cengiz (PI); William Tamborlane (I); Kate Weyman (I); Michelle Van Name (I); Neha Patel (I); Jennifer Sherr (I); Eileen Tichy (I); Amy Steffen (C); Melinda Zgorski (C); Lori Carria (C); Jennifer Finnegan (C); Elvira Duran (C) **Boston, MA Joslin Diabetes Center- Pediatric** (n=530) Sanjeev Mehta (PI); Michelle Katz (I); Lori Laffel (I); Elisa Giani (I); Rebecca Snelgrove (I); Anat Hanono (I); Persis Commissariat (I); Julie Griffith (I); Ashley Atkins (I); Kara Harrington (I); Kenny Kim (C); Luisa Masclans (C); Nisha Naik (C); Louise Ambler-Osborn (C); Alan Schultz (C); Charlotte Cohen (C); Brittany Anderson (C); **St. Louis, MO Washington University** (n=527) Janet McGill (PI); Andrea Granados (I); Mary Jane Clifton (C); Stacy Hurst (C); Sarah Kissel (C); Carol Recklein (C); **Detroit, MI Henry Ford Health System** (n=470) Davida Kruger (PI); Arti Bhan (I); Terri Brown (I); Andreana Tassopoulos (C); Angela Hailey (C); Heather Remtema (C); Terra Cushman (C) **Louisville, KY University of Louisville** (n=456) Kupper Wintergerst (PI); Sara Watson (I); Suzanne Kingery (I); Lauren Rayborn (I); Heather Rush (I); Michael Foster (I); Amy Deuser (C); Manuel Rodriguez-Luna (C); Stephanie Eubanks (C) **Tampa, FL University of South Florida Diabetes Center** (n=444) Henry Rodriguez (PI); Sureka Bollepalli (I); Laura Smith (I); Dorothy Shulman (I); E. Verena Jorgensen (I); Emily Eyth (C); Rachel Brownstein (C); Janet Rodriguez (C); Juanita O'Brian (C); **Chicago, IL Northwestern University** (n=421) Grazia Aleppo-Kacmarek (PI); Allison Hahr (I); Mark Molitch (I); El Muayed (I); Daniel Toft (I); Candice Fulkerson (C); Daphne Adelman (C); Elaine Massaro (C); Kimberly Webb (C); **Los Angeles, CA University of Southern California - Community Diabetes Initiatives** (n=380) Anne Peters (PI); Valerie Ruelas (C); Mark Harmel (C); **Orange, CA Children's Hospital of Orange County** (n=378) Mark Daniels (PI); Nikta Forghani (I); Timothy Flannery (I); Christina Reh (I); Amrit Bhangoo (I); Himala Kashmiri (I); Keirsten Montgomery (I); Lien Trinh (I); Heather Speer (C); Kristen Lane (C); **Minneapolis, MN International Diabetes Center/Park Nicollet Pediatric Endocrinology** (n=376) Richard Bergenstal (PI); Thomas Martens (I); Marcia Madden (I); Margaret Powers (I); Amy Criego (I); Andes Carlson (I); Beth Olson (C); Shannon Beasley (C); Kathleen McCann (C); LeeAnn Thomas (C); Cassie Miller (C); Charlotte Ashanti (C); **Charlottesville, VA University of Virginia Health System** (n=367) Christine Burt Solorzano (PI); Jennifer Puskaric (C); **Durham, NC University of North Carolina Diabetes Care Center** (n=364) Robert Benjamin (PI); Deanna Adkins (I); Amber Spruill (C); Cathy Williams (C); **Iowa City, IA University of Iowa Children's Hospital** (n=355) Eva Tsalikian (PI); Michael Tansey (I); Nidhi Bansal (I); Joanne Cabbage (C); Julie Coffey (C); Rachel Bisbee (C); **Gainesville, FL University of Florida** (n=355) Desmond Schatz (PI); Michael Clare-Salzler (I); Kenneth Cusi (I); Becky Fudge (I); Mike

## SUPPLEMENTARY DATA

Haller (I); Collette Meehan (I); Henry Rohrs (I); Janet Silverstein (I); Ashby Walker (I); Anastasia Albanese-O’Niell (I); Stephanie Foss (C); Janey Adams (C); Miriam Cintron (C); Nicole Thomas (C); **San Diego, CA University of California** (n=353) Michael Gottschalk (PI); Ron Newfield (I); Marla Hashiguchi (C); **Oklahoma City, OK University of Oklahoma Health Sciences Center Dept. of Pediatric Diabetes and Endocrinology** (n=338) David Sparling (PI); Jeanie Tryggested (I); Joni Beck (I); Joane Less (C); Linda Weber (C) **San Francisco, CA University of California, San Francisco Medical Center (UCSF)** (n=333) Saleh Adi (PI); Stephen Gitelman (I); Srinath Sanda (I); Jenise Wong (I); Mary McDonnell (C); Monica Mueller (C); Zara Izadi (C); Swaroop Mistry (C) **Greenville, SC Greenville Hospital System Pediatric Endocrinology** (n=329) Bryce Nelson (PI); Lisa Looper (C); Carrie Frost (C); **Houston, TX Baylor College of Medicine / Texas Children's Hospital** (n=325) Maria Redondo (PI); Sarah Lyons (I); Sara Klinepeter (I); Kelly Fegan-Bohm (I); Fida Bacha (I); Daniel DeSalvo (I); Ashley Butler (I); Marisa Hilliard (I); Farida Khetani (C); Ronald Yulatic (C); Robert Hudson (C); Laura Irvine (C); Sadia Zubair (C); Cory Pace (C); Abelin Pitrello (C); Wendy Levy (C); Charity Njoku (C); **Columbus, OH Central Ohio Pediatrics Endocrinology and Diabetes Services** (n=318) William Zipf (PI); Jennifer Dyer (I); Rolando Lozano (I); Diane Seiple (C); Grant Corven (C); Megan Jaycox (C) **Cleveland, OH University Hospitals of Cleveland**(n=301) Jamie Wood (PI); Sarah Macleish (I); Rose Gubitosi-Klug (I); Ramon Adams (C); Paul McGuigan (C); Terri Casey (C); Wendy Campbell (C); **Sioux Falls, SD Avera Research Institute** (n=281) Julie Kittelsrud (PI); Ashutosh Gupta (I); Vikki Peterson (C); **Pittsburgh, PA Children's Hospital of Pittsburgh of UPMC** (n=253) Ingrid Libman (PI); Ana Diaz (C); **Tulsa, OK Harold Hamm Diabetes Center, University of Oklahoma** (n=248) David Jelley (PI); Christina Crowder (C); Dana Greer (C); Julia Crawford (C); Sharnella Goudeau (C); **Seattle, WA Seattle Children's Hospital** (n=247) Catherine Pihoker (PI); Joyce Yi-Frazier (I); Susan Kearns (C); Michael Pascual (C); Beth Loots (C); Natalie Beauregard (C); **Philadelphia, PA University of Pennsylvania Perelman School of Medicine/Rodebaugh Diabetes Center** (n=236) Michael Rickels (PI); Shannon O’Brien (I); Shivani Agarwal (I); Amy Peleckis (I); Cornelia Dalton-Bakes (C); Eileen Markmann (C); **Atlanta, GA Emory University** (n=235) Guillermo Umpierrez (PI); Andrew Muir (I); Clementina Ramos (C); Keywan Behbahani (C); Neil Dhruv (C); Nolan Gartzman (C); **Minneapolis, MN University of Minnesota** (n=228) Brandon Nathan (PI); Melena Bellin (I); Muna Sunni (I); Nancy Flaherty (C); Janice Leschyshyn (C); Kara Schmid (C); Darcy Weingartner (C); Marrissa Ludwig (C); Brittney Nelson (C); Anne Kogler (C); Avery Bartyzal (C); Anne Street (C); Beth Pappenfus (C); Jessica Sweet (C) **Durham, NC University of North Carolina Diabetes Care Center** (n=194) John Buse (PI); Laura Young (I); Katherine Bergamo (I); April Goley (I); Marian Kirkman (I); Jamie Diner (C); Alex Kass (C); Milana Dezube (C); **Ocean Springs, MS The Diabetes Center, PLLC** (n=190) Kathleen Arnold (PI); Traci Evans (I); Sharon Sellers (C); **Baltimore, MD Johns Hopkins University Pediatric Endocrinology** (n=190) Scott Blackman (PI); Kimber-Lee Abel (C); Lisa Rasbach (C); **Milwaukee, WI The Medical College of Wisconsin/Children's Hospital of WI** (n=188) Omar Ali (PI); Peter Wolfgram (I); Rosanna Fiallo-Sharer (I); Joanna Kramer (C); Christina Beesley (C); Clare Bingham-Tyson (C); Rachel Unteutsch (C); **Worcester, MA University of Massachusetts Medical School** (n=185) David Harlan (PI); Mary Lee (I); Leslie Soyka (I); Penny Feldman (I); Michael Thompson (I); Karen Gallagher-Dorval (C); Lisa Hubacz (C); Celia Hartigan (C); Carol Ciccarella (C); **Rapid City, SD Regional Health Clinical Research** (n=183) Rachel Edelen (PI); Michelle Edelen (I); Trista Borgwadt (C); Kirstin Stauffacher (C); Kelly DeGrote (C); Crystal Gruetzmacher (C); Michael Shepperd (C); **Des Moines, IA Iowa Diabetes and Endocrinology Research Center** (n=182) Anuj Bhargava (PI); Diana Wright (I); Kathleen Fitzgerald (I); Teck Khoo (I); Natalie Young (C); Lisa Borg (C); Kirstie Stifel (C); Cindy Rail (C); **Sioux Falls, SD Sanford Research/USD** (n=180) Luis Casas (PI); Elizabeth Eidenshink (C); Christina Huber (C); Alex Rieder (C); Amy Tuchscherer (C); Megan Broadbent (C); **Cincinnati, OH Cincinnati Children's Hospital Medical Center** (n=174) Lawrence Dolan (PI); Sarah Corathers (I); Jessica Kichler (I); Nicole Sheanon (I); Holly Baugh (C); Debbie Standiford (C); Tammy Weis (C); Catherine Fox (C); Carrie

## SUPPLEMENTARY DATA

Schultz (C); Amy Ritter (C); **Miami, FL University of Miami, Diabetes Research Institute** (n=167) Francesco Vendrame (PI); Carlos Blashke (C); Della Matheson (C); Natalia Sanders-Branca (C); **Billings, MT St. Vincent Healthcare/Internal Medicine and Diabetes** (n=166) Justen Rudolph (PI); Doris Biersdorf (C); Jane Fitch-Danielson (C); **Nashville, TN Vanderbilt Eskind Diabetes Clinic** (n=166) Dara Eckerle-Mize (PI); Faith Brendle (C); Janet Fry (C); Dianne Davis (C); Cynthia Lovell (C); Brenna Hammel (C); Lauren Williams (C); **Columbus, OH The Research Institute at Nationwide Children's Hospital** (n=166) Robert Hoffman (PI); Monika Chaudhari (I); Manmohan Kamboj (I); Lindsey Carr (C); **Bismarck, ND Medcenter One** (n=156) Luis Casas (PI); Julie Blehm (I); Anthony Tello (I); Julie Ann Walter (C); Rhonda Ward (C); Megan Broadbent; **Billings MT Billings Clinic Hospital** (n=135) Gabriel Blomquist (PI); Maria Stewart (I); Paige Cross (C); Sarah Racki (C); Lindsey Sterchi (C); Diane Gouine (C); Becky Kiesow (C); Stephanie Welch (C); **San Diego, CA Scripps Whittier Diabetes Institute** (n=130) Athena Philis-Tsimikas (PI); George Daily (I); Amy Chang (I); James McCallum (I); Isabel Garcia (C); Teresa Vela (C); Ioanna Loupasi (C); Rosario Rosal (C); **Boston, MA Joslin Diabetes Center – Adult** (n=129) Elena Toschi (PI); Roeland Middelbeek (I); Medha Munshi (I); Christine Slyne (C); Astrid Atakov-Castillo (C); **Jacksonville, FL Nemours Children's Clinic** (n=129) Larry Fox (PI); Nelly Mauras (I); Rachel Wasserman (I); Ligeia Damaso (C); Kim Englert (C); Kaitlin Sikes (C); Kim Ponthieux (C); **Chicago, IL The University of Chicago** (n=117) Louis Phillipson (PI); Ashley Cohen (C); Gail Gannon (C); **Tallahassee, FL Tallahassee Memorial Diabetes Center** (n=109) Larry Deeb (PI); April Shiver (C); **Findlay, OH Blanchard Valley Medical Associates** (n=103) Leroy Schroeder (PI); Wendi Schworm (I); Kristina Graham (C); **New York, NY Mt Sinai Diabetes Center** (n=85) Carol Levy (PI); David Lam (I); Elizabeth Burtman (I); Camilla Levister (C); Selassie Ogyaadu (C); **Vallejo, CA Kaiser Permanente** (n=78) Heidi Gassner (PI); Julie Duke (C); **Phoenix, AZ Phoenix Children's Hospital** (n=76) Leslie Touger (PI); Dorothee Newbern (I); Francine Hoekstra (C); **Paterson, NJ St. Joseph's Children's Hospital** (n=65) Katerina Harwood (PI); Vijaya Prasad (I); JoAnne Daguanno (C); **Orlando, FL Florida Hospital** (n=58) Richard Pratley (PI); Karen Corbin (I); Mia Wright (C); Susann Nagel (C); Natasha Water (C); Matthew Ghere (C); Keri Whitaker (C); **New York, NY Children's Hospital at Montefiore** (n=48) Rubina Heptulla (PI); Ranjitha Katikaneni (C); Doreen Johnson-Newell (C); **New York, NY Albert Einstein College of Medicine** (n=44) Jill Crandall (PI); Danielle Powell (C); Valentin Anghel (C); **Hackensack, NJ Joseph M. Sanzari Children's Hospital** (n=24) Steven Ghanny (PI); Javier Aisenberg (I); Amy Chartoff (I); Jennifer Sivitz (I); Susan Mathus (C); Toni-Lyn Cospito (C); **Lexington, KY UK Healthcare University of Kentucky** (n=18) Kathryn Thailkill (PI); John Fowlkes (I); Evangelia Kalaitzoglou (I); Alba Morales Pozzo (I); Kathy Edwards (C)
